# Supplementary material for: Synergistic integration of thermocatalysis and photocatalysis on black defective (BiO)2CO3 microspheres
Source: Royal Society of Chemistry journal article supplement (doi:10.1039/c5ta05099e), 2015-01-01
Supplement: c5ta05099e1.pdf [file c5ta05099e1.pdf]

**Electronic Supplementary Information for**  
**Synergistic Integration of Thermocatalysis and**  
**Photocatalysis on Black Defective (BiO)<sub>2</sub>CO<sub>3</sub> Microspheres**

Fan Dong <sup>a,\*</sup>, Ting Xiong <sup>a</sup>, Yanjuan Sun <sup>a</sup>, Hongwei Huang <sup>b</sup>, and Zhongbiao Wu <sup>c,\*</sup>

<sup>a</sup> Chongqing Key Laboratory of Catalysis and Functional Organic Molecules, College of Environmental and Biological Engineering, Chongqing Technology and Business University, 400067 Chongqing, China.

<sup>b</sup> School of Materials Science and Technology, National Laboratory of Mineral Materials, China University of Geosciences, Beijing 100083, China.

<sup>c</sup> Department of Environmental Engineering, Zhejiang University, Hangzhou 310027, China.

\* To whom correspondence should be addressed. E-mail: dfctbu@126.com (Fan Dong), zbwu@zju.edu.cn (Zhongbiao Wu)

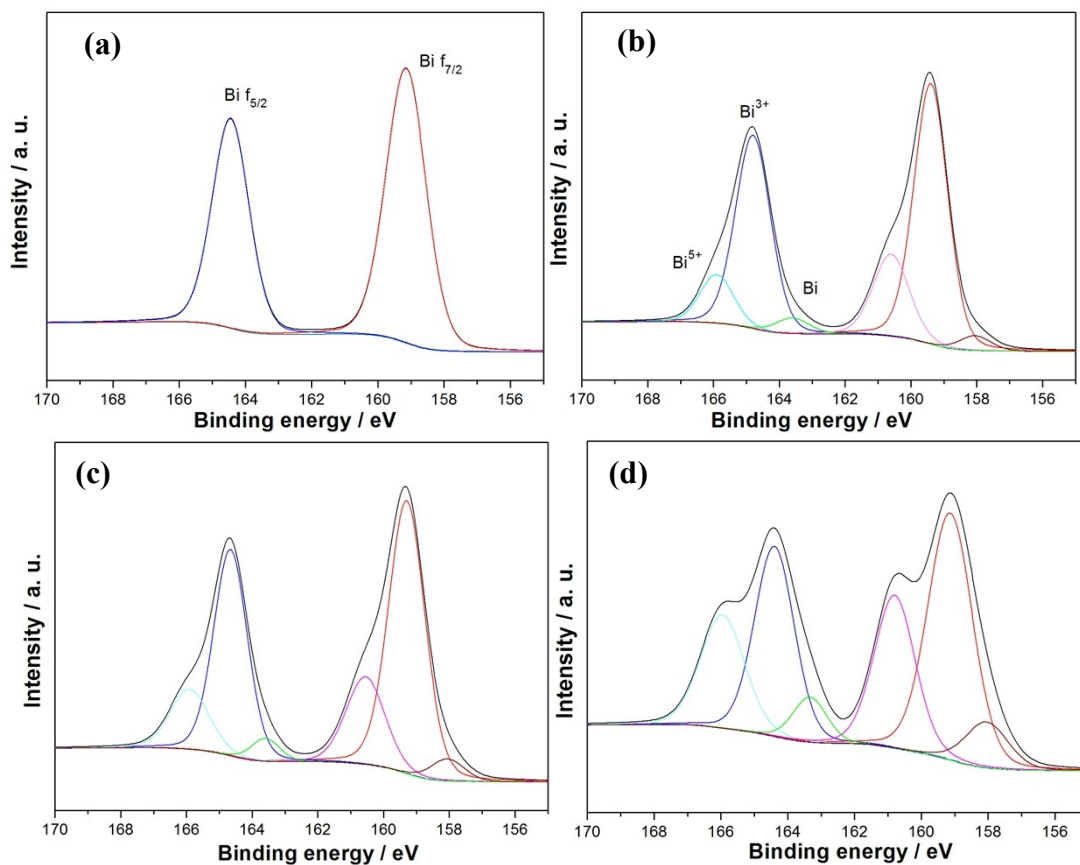

Fig. S1 XPS spectra (Bi<sub>4f</sub>) of the BOC (a), BOC-250 (b), BOC-275 (c) and BOC-300 (d).

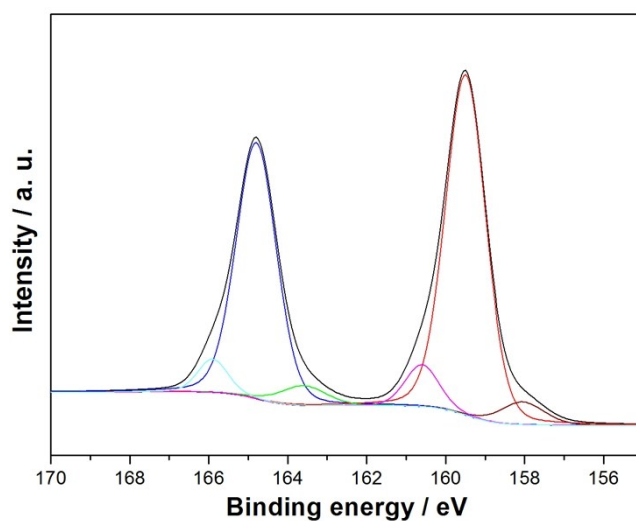

Fig. S2 XPS spectra (Bi<sub>4f</sub>) of the BOC-300-after after reaction.

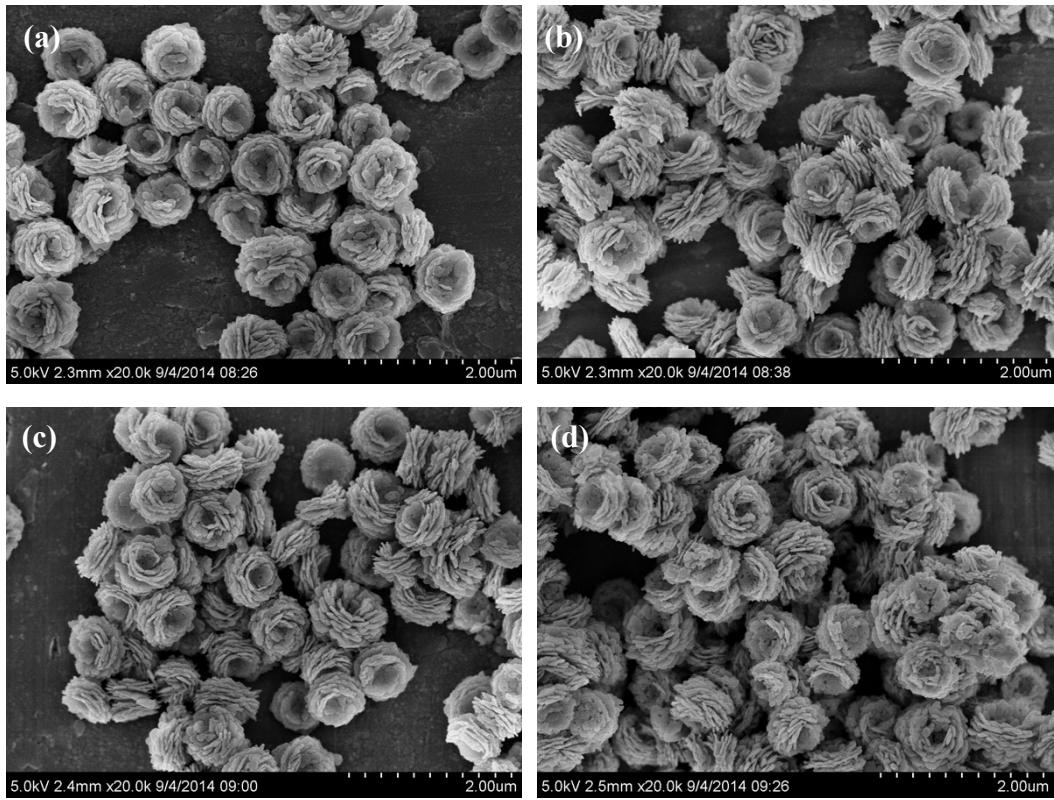

Fig. S3 SEM images of the BOC (a), BOC-250 (b), BOC-275 (c) and BOC-300 (d).

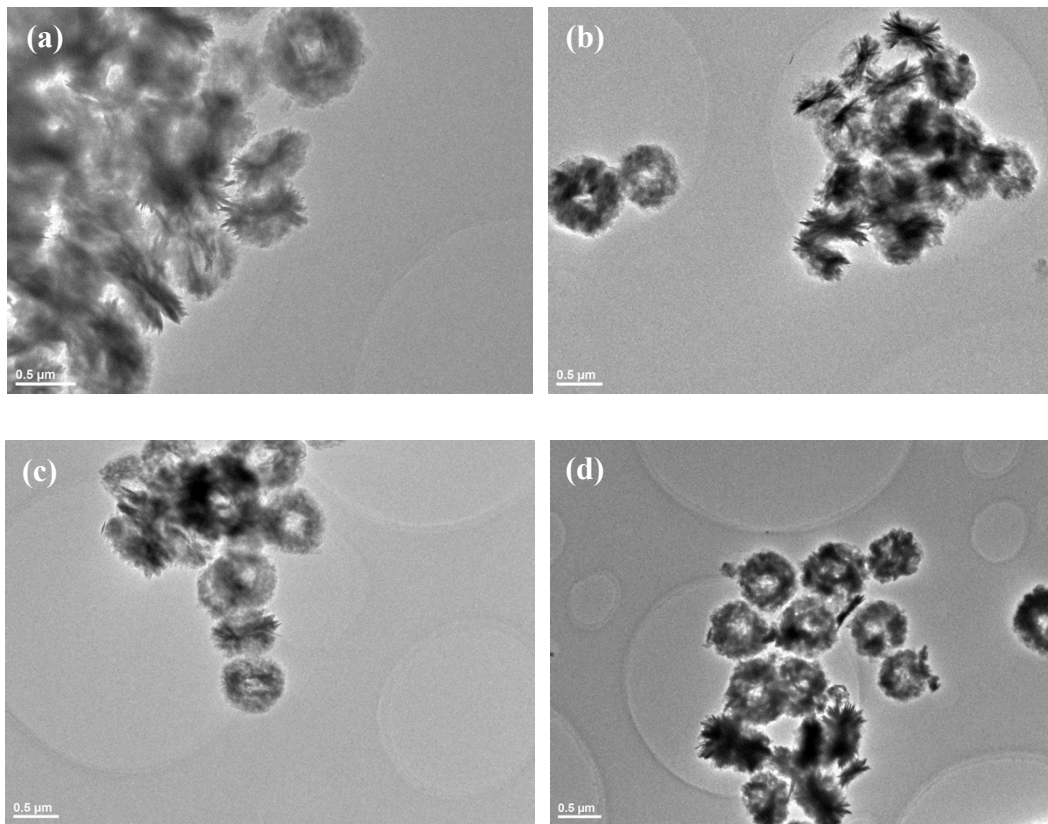

Fig. S4 TEM images of the BOC (a), BOC-250 (b), BOC-275 (c) and BOC-300 (d).

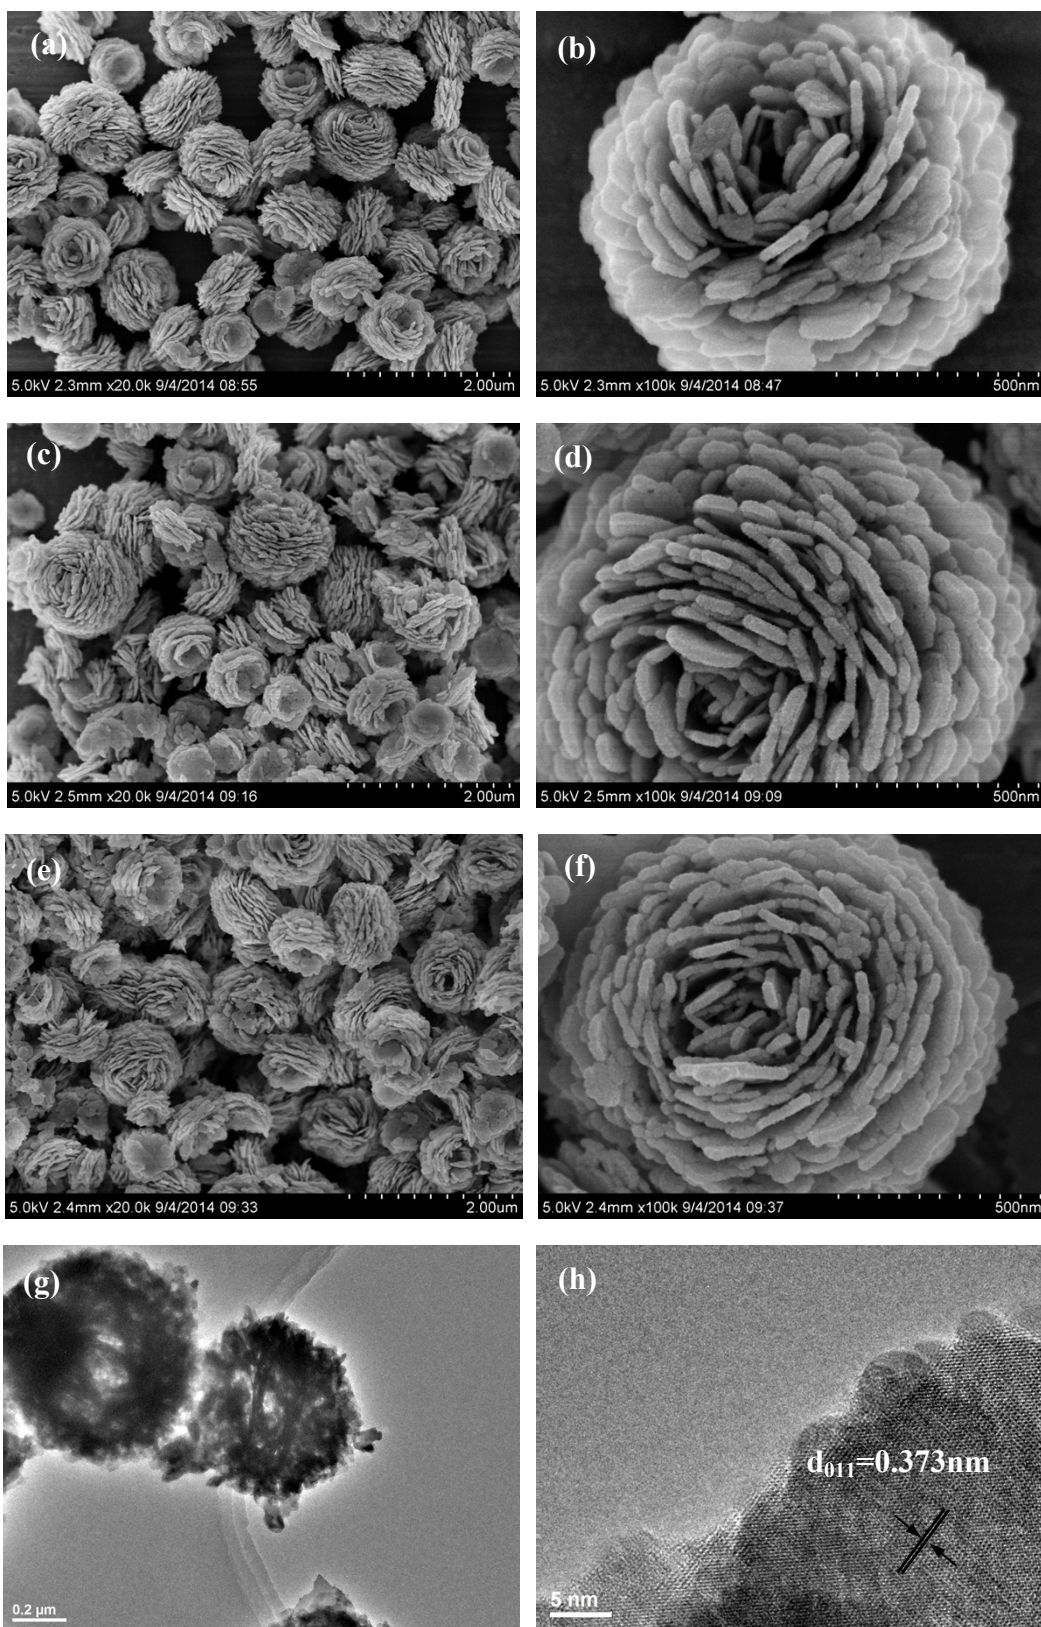

Fig. S5 SEM images of the BOC-250-after (a, b), BOC-275-after (c, d), BOC-300-after (e, f) and TEM images of BOC-300-after (g, h).

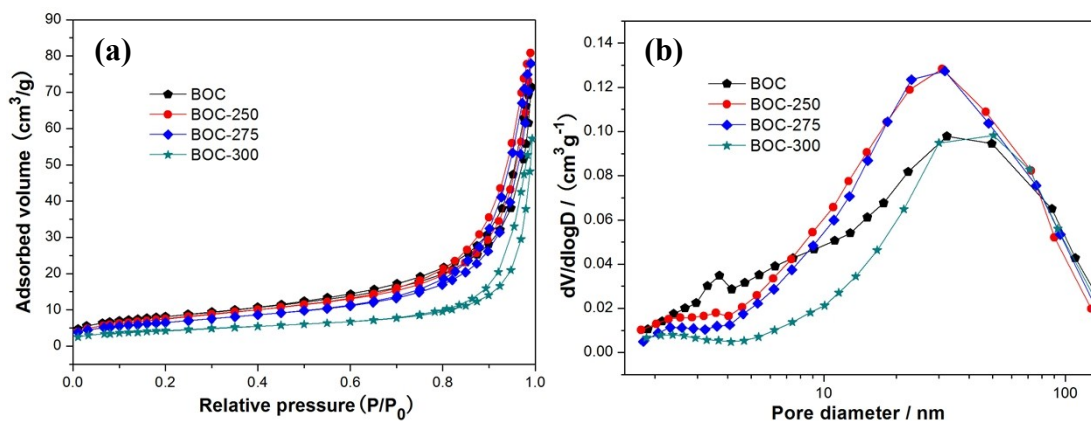

Fig. S6  $N_2$  adsorption-desorption isotherm (a) and the corresponding pore diameter distributions (b) of as-obtained samples.

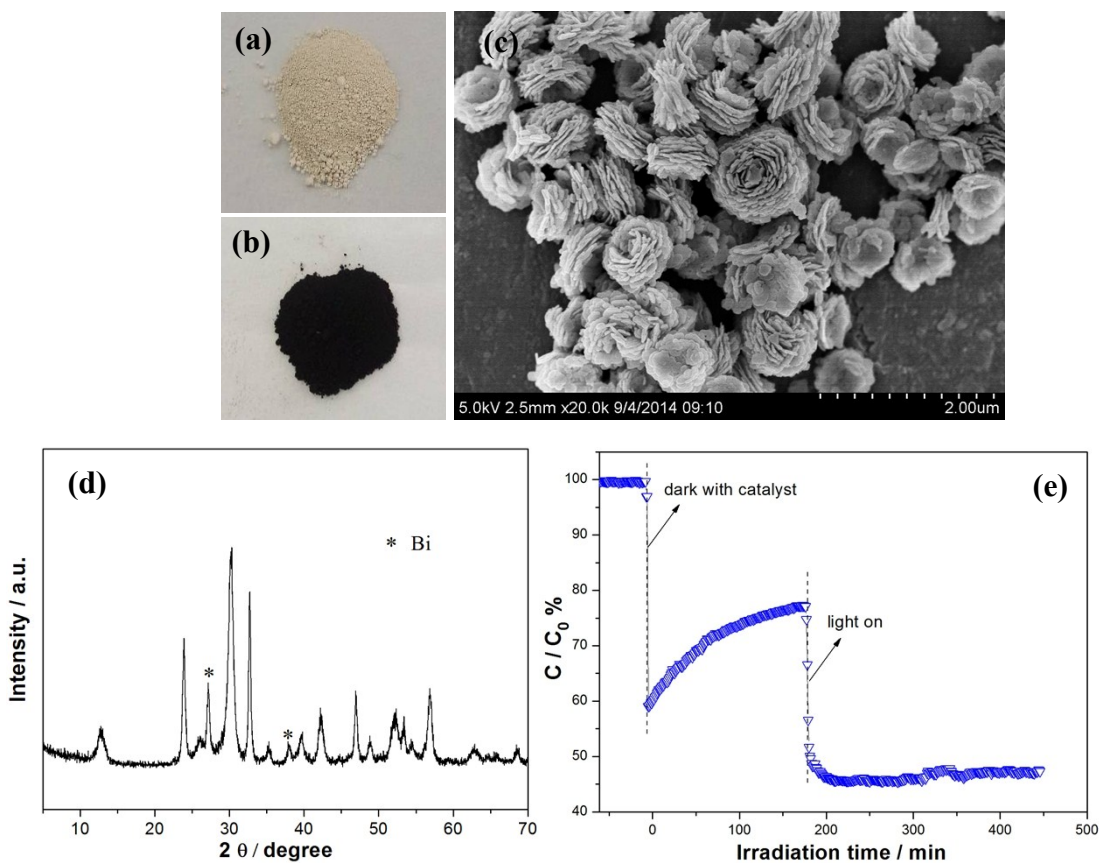

Fig. S7 The color of the BOC-275-after (after exposed to the air for half a year) before (a) and after (b) a second vacuum treat. SEM (c), XRD (d) and catalytic activity toward the removal of NO in the dark and under the visible light irradiation ( $\lambda > 420$  nm) at room temperature (e) of the regenerated samples (BOC-275-after after a second vacuum treat).
